# Supplementary material for: Facile synthesis and photoluminescence of graphene oxide quantum dots and their reduction products
Source: Royal Society of Chemistry journal article supplement (doi:10.1039/c4nj01187b), 2014-01-01
Supplement: c4nj01187b1.pdf [file c4nj01187b1.pdf]

## Supporting Information

### Facile Synthesis and Photoluminescence of graphene oxide quantum dots and its reduction product

Yin Zhang<sup>a</sup>, Hui Gao<sup>a</sup>, Jingjing Niu, Bitao Liu

School of Physical Science and Technology, Key Laboratory for Magnetism and Magnetic Materials of Ministry  
of Education, Lanzhou University, Lanzhou 730000, P.R. China

E-mail: hope@lzu.edu.cn

<sup>a</sup>These authors contributed equally to this work.

#### Supplementary Figures

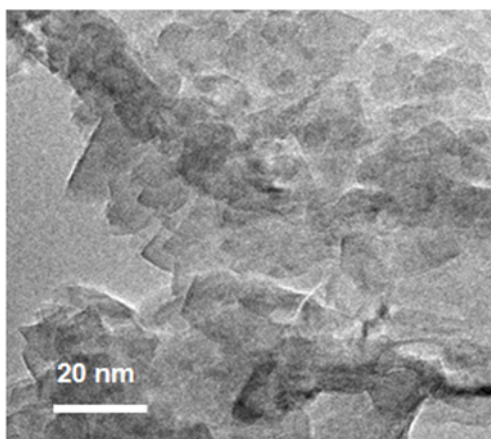

**Figure S1.** SEM image of GOQDs 3

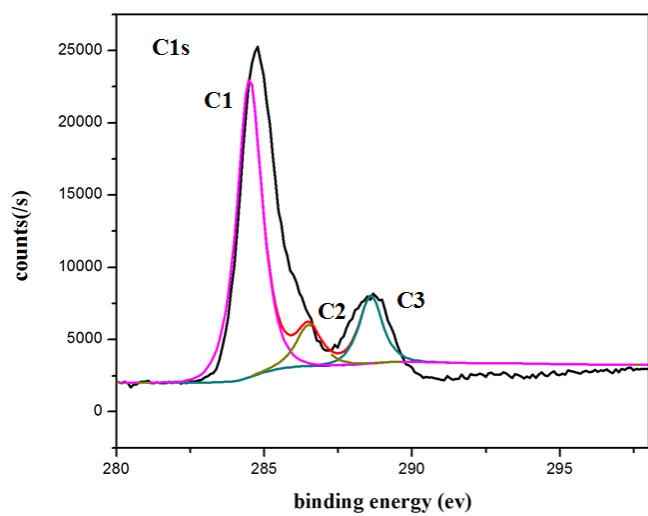

**Figure S2.** C1s XPS spectra of graphene oxide quantum dots.
